# Supplementary material
Source: PubMed Central journal article supplement (PMC7256548)
Supplement: mmc1.pdf [file mmc1.pdf]

**Original Research:**

**The Psychological Impact of COVID-19 Pandemic on Health Care Workers in a MERS-CoV Endemic Country**

**Running Title: Healthcare workers anxiety from COVID19 versus MERS-CoV**

Mohamad-Hani Temsah, MD, FRCPCH, <sup>1,2,3\*</sup> Fahad Al-Sohime, MD, <sup>1,2\*</sup> Nurah Alamro, MD, DrPH, <sup>1,4,5</sup>, Ayman AL-Eyadhy, MD, <sup>1,2</sup> Khalid Al-Hasan, MD, <sup>1,2</sup> Amr Jamal, MD, <sup>1,4,6</sup> Ibrahim Al-Maglouth, MD, MSc, FRCPC, <sup>1,7</sup> Fadi Aljamaan, MD, <sup>1, 8</sup> Maha Al Amri, MD, <sup>9</sup> Mazin Barry, MD, FRCPC, FACP, DTM&H, <sup>1,10</sup> Sarah Al-Subaie, MD, <sup>1,2</sup> Ali Mohammed Somily, MD, FRCPC.

1. College of Medicine, King Saud University, Riyadh, Saudi Arabia
2. Department of Pediatrics, King Saud University Medical City, Riyadh, Saudi Arabia
3. Prince Abdullah Bin Khaled Coeliac Disease Chair, Faculty of Medicine, King Saud University, Saudi Arabia
4. Department of Family and Community Medicine, King Saud University Medical City, Riyadh, Saudi Arabia
5. Prince Sattam bin Abdulaziz Research Chair for Epidemiology and Public Health, King Saud University, Riyadh, Saudi Arabia
6. Evidence-Based Health Care & Knowledge Translation Research Chair, King Saud University, Riyadh, Saudi Arabia
7. College of Medicine Research Center, King Saud University, Saudi Arabia
8. Adult Critical Care Department, King Saud University, King Saud University Medical City / King Khalid University Hospital, Riyadh, Saudi Arabia
9. Department of Infectious Disease, King Faisal Specialist Hospital and Research Center, Riyadh, Kingdom of Saudi Arabia
10. Infectious Disease Unit, Department of Internal Medicine, King Saud University, Riyadh, Saudi Arabia
11. Department of Pathology and Laboratory Medicine, King Saud University and King Saud University Medical City, Riyadh, Saudi Arabia

\* First two authors contributed equally to this research

**Corresponding author:**

**Prof. Ali Mohammed Somily**

MBBS, FRCPC, D(ABMM), FCCM

Professor and Consultant Microbiologist

College of Medicine, King Saud University, King Saud University Medical City, Microbiology (32)

PO Box 2925, Riyadh 11461, Kingdom of Saudi Arabia

Email: somily@ksu.edu.sa / ali.somily@gmail.com

Tel # +96611-467-2640/ +96611467-1010, Fax # +96611-467-2462
